duced postoperative fatigue, heightened feeling of well-being, and better maintenance of homeostasis.<sup>6-8</sup> Moreover, clinically significant carbon dioxide embolism is rare (0.001%) during laparoscopic procedures<sup>9,10</sup> unlike PFO whose incidence is relatively high. Therefore, we believe that PFO cannot be a ground for eliminating laparoscopic surgery from possible surgical treatments.

**Chang Seok Kim, M.D., Ji Young Kim, M.D., Ja-Young Kwon, M.D., Seung Ho Choi, M.D., Ph.D., Sungwon Na, M.D., Jiwon An, M.D., Ki Jun Kim, M.D., Ph.D.\*** \*Anesthesia and Pain Research Institute, Yonsei University College of Medicine, Seoul, Korea. kkj6063@yuhs.ac

## References

1. Kim CS, Kim JY, Kwon JY, Choi SH, Na S, An J, Kim KJ: Venous air embolism during total laparoscopic hysterectomy: Comparison to total abdominal hysterectomy. *ANESTHESIOLOGY* 2009; 111:50-4
2. Chang DI, Lee MS, Cho SH, Bu SH, Chung SH, Huh SH, Yoon KU, Ahn TB, Yoon SS, Chung KC: Incidence of patent foramen ovale in ischemic stroke patients: A transcranial Doppler study. *J Korean Neurol Assoc* 2005; 23:313-7
3. Hwang HK, Hong SK, Kim MA, Lee SH, Kim PG, Moon HS, Lee SM: Intraoperative detection of patent foramen ovale by transesophageal echocardiography. *J Korean Soc Echocardiogr* 1993; 1:97-101
4. Choi SH, Lee SJ, Jung Y, Shin YS, Jun DB, Hwang KH, Liu J, Kim KJ: Nitroglycerin- and nicardipine-induced hypotension does not affect cerebral oxygen saturation and postoperative cognitive function in patients undergoing orthognathic surgery. *J Oral Maxillofac Surg* 2008; 66:2104-9
5. Longnecker DE, Murphy FL: Introduction to Anesthesia, 9th edition. Philadelphia, WB Saunders Co, 1997, pp 130
6. Jakeways MS, Mitchell V, Hashim IA, Chadwick SJ, Shenkin A, Green CJ, Carli F: Metabolic and inflammatory responses after open or laparoscopic cholecystectomy. *Br J Surg* 1994; 81:127-31
7. Delaunay L, Bonnet F, Cherqui D, Rimaniol JM, Dahan E, Atlan G: Laparoscopic cholecystectomy minimally impairs postoperative cardiorespiratory and muscle performance. *Br J Surg* 1995; 82:373-6
8. Joris J, Cigarini I, Legrand M, Jacquet N, De Groote D, Franchimont P, Lamy M: Metabolic and respiratory changes after cholecystectomy performed via laparotomy or laparoscopy. *Br J Anaesth* 1992; 69:341-5
9. Bonjer HJ, Hazebroek EJ, Kazemier G, Giufrida MC, Meijer WS, Lange JF: Open versus closed establishment of pneumoperitoneum in laparoscopic surgery. *Br J Surg* 1997; 84:599-602
10. Mintz M: Risks and prophylaxis in laparoscopy: A survey of 100,000 cases. *J Reprod Med* 1977; 18:269-72

(Accepted for publication October 28, 2009.)

## Anesthetic Effects and Lipid Resuscitation Protocols

To the Editor:

Hicks *et al.*<sup>1</sup> studied the effect of lipid emulsion, epinephrine, and vasopressin on survival rate after bupivacaine-induced cardiac arrest in a porcine model. The results of the authors demonstrated a completely different and unexpected outcome when compared with previous studies that used rodent and canine models. Although species difference may partially

explain the different outcomes, one must acknowledge that the anesthetics used in these studies were also markedly different. It is possible to study conscious animals in a canine model because dogs are easily trained. This closely mimics the human clinical scenario when bupivacaine is inadvertently injected intravenously during an attempted regional anesthetic with minimal sedation. Conversely, swine are more difficult to handle without heavy sedation or general anesthesia. Governmental regulations may sometimes disallow animal experimentation in the conscious state. Hicks *et al.* used ketamine, xylazine, and  $\alpha$ -chloralose to induce general anesthesia. These drugs are known to work well in large animals such as swine. In a similar porcine study, Mayr *et al.*<sup>2</sup> used azaperone, atropine, ketamine, and piritramid followed by isoflurane after intubation. These anesthetic regimens produce hemodynamic and cardiac electrophysiologic effects, which may explain the failure of lipid rescue protocols in these studies.

Azaperone is a butyrophenone that, like droperidol, may have detrimental electrophysiologic effects at the high doses used in animals.<sup>2</sup> Azaperone also blocks  $\alpha$ -adrenergic receptors, producing hypotension, impaired thermoregulation,<sup>3,4</sup> and probably causing the extreme hypotension in the absence of epinephrine in the study of Mayr *et al.*<sup>2</sup> Hicks *et al.*<sup>1</sup> used  $\alpha$ -chloralose, an anesthetic that was historically used as a rodenticide.<sup>5</sup>  $\alpha$ -Chloralose decreases cardiac conduction velocity in the cardiac muscle and atrioventricular node, prolongs the QTc interval, delays atrioventricular conduction, increases the ventricular refractory period, and exacerbates atrioventricular block caused by verapamil.<sup>6</sup> Drugs that decrease cardiac conduction velocity will enhance bupivacaine arrhythmias,<sup>7</sup> and  $\alpha$ -chloralose has also been shown to be proarrhythmic toward the ischemic porcine heart.<sup>8</sup> One can speculate that even if lipid rescue could partially reverse the effects of lipophilic drugs such as bupivacaine, one would not expect this for hydrophilic drugs such as  $\alpha$ -chloralose. Through multiple hemodynamic and electrophysiologic effects, the anesthetics, as used in these porcine studies of bupivacaine-induced cardiac arrest, may have contributed to the failure of lipid rescue. For animal studies to optimally contribute to our understanding of resuscitation from inadvertent bupivacaine toxicity, studies should incorporate anesthetic and sedative techniques as that used in humans.

**Harvey J. Woehlck, M.D.,\* Mohammad El-Orbany, M.D.**

\*Medical College of Wisconsin, Milwaukee, Wisconsin. hwoehlck@mcw.edu

## References

1. Hicks SD, Salcido DD, Logue ES, Suffoletto BP, Empey PE, Poloyec SM, Miller DR, Callaway CW, Menegazzi JJ: Lipid emulsion combined with epinephrine and vasopressin does not improve survival in a swine model of bupivacaine induced cardiac arrest. *ANESTHESIOLOGY* 2009; 111:138-46
2. Mayr VD, Mitterschiffthaler L, Neurauder A, Gritsch C, Wenzel V, Mueller T, Luckner G, Lindner KH, Strohmenger HU: A comparison of the combination of epinephrine and vasopressin with lipid emulsion in a porcine model of asphyxial

- cardiac arrest after intravenous injection of bupivacaine. *Anesth Analg* 2008; 106:1566-71
- van Woerkens LJ, Duncker DJ, Huigen RJ, van der Giessen WJ, Verdouw PD: Redistribution of cardiac output caused by opening of arteriovenous anastomoses by a combination of azaperone and metomidate. *Br J Anaesth* 1990; 65:393-9
  - Gregory NG, Wilkins LJ: Effect of azaperone on cardiovascular responsiveness in stress-sensitive pigs. *J Vet Pharmacol Ther* 1986; 9:164-70
  - Lees P: Pharmacology and toxicology of alpha chloralose: A review. *Vet Rec* 1972; 91:330-3
  - Schwartz JB, Heere JM: The electrophysiological effects of alpha-chloralose anesthesia in the intact dog: (1) alone and (2) in combination with verapamil. *Pacing Clin Electro-physiol* 1989; 12:283-93
  - Aya AGM, de La Coussaye JE, Robert E, Ripart J, Cuvillon P, Mazoit JX, Jeannes P, Fabbro-Peray P, Eldjam JJ: Comparison of the effects of racemic bupivacaine, levobupivacaine, and ropivacaine on ventricular conduction, refractoriness, and wavelength. *ANESTHESIOLOGY* 2002; 96:641-50
  - Bardaji A, Cinca J, Worner F, Schoenenberger A: Effects of anaesthesia on acute ischaemic arrhythmias and epicardial electrograms in the pig heart in situ. *Cardiovasc Res* 1990; 24:227-31

(Accepted for publication October 28, 2009.)

#### In Reply:

We thank Drs. Woehlck and El-Orbany for their interest in our recently published article that examined lipid emulsion using a porcine model of bupivacaine-induced cardiac arrest.<sup>1</sup> Their letter raises several important issues. In the Discussion section of our article, we explained some of the major differences between the various animal models that have been used to evaluate lipid treatment for local anesthetic toxicity.

We recognize the potential drug interactions between the anesthetics agents and the experimental protocol. The anesthetic agents, such as xylazine, ketamine, and  $\alpha$ -chloralose, were chosen to preserve hemodynamic and electrophysiologic stability at the doses used in our study. Propofol was avoided because of the confounding effect of lipid pretreatment, as found in other animal studies of this nature. Despite this limitation, we were able to achieve a stable hemodynamic profile in all animals before the induction of cardiac arrest with the bupivacaine injection. After examining the electrocardiographic data (mean  $\pm$  SD), we did not observe any occurrences of prolonged PR ( $120.6 \pm 13.7$ ), QRS ( $59.1 \pm 14.6$ ), or QTc intervals ( $347.4 \pm 26.4$ ), during the baseline period before the induction of cardiac arrest.<sup>2</sup> Our electrophysiologic data are perhaps different from the results mentioned in the letter of Woehlck and El-Orbany because much higher doses of  $\alpha$ -chloralose were used in other studies (75 mg/kg in one study<sup>3</sup> and 100 mg/kg in another<sup>4</sup>) in contrast to a moderate dose of 40 mg/kg used in our study.

We agree with Drs. Woehlck and El-Orbany that it would be useful to consider further experiments that expand our understanding of the potential therapeutic benefits of lipid emulsion in the setting of cardiac arrest induced by

toxic doses of local anesthetic, especially at a time when various national and international organizations are in the process of developing recommendations incorporating lipid treatment.

**Shawn D. Hicks, M.D., M.Sc.,\* Clifton W. Callaway, M.D., Ph.D., Donald R. Miller, M.D., James J. Menegazzi, Ph.D.** \*University of Ottawa, Ottawa, Ontario, Canada, and University of Pittsburgh, Pittsburgh, Pennsylvania. shawn\_hicks@alumni.pitt.edu

#### References

- Hicks SD, Salcido DD, Logue ES, Suffoletto BP, Empey PE, Poloyec SM, Miller DR, Callaway CW, Menegazzi JJ: Lipid emulsion combined with epinephrine and vasopressin does not improve survival in a swine model of bupivacaine induced cardiac arrest. *ANESTHESIOLOGY* 2009; 111:138-46
- Stubhan M, Markert M, Mayer K, Trautmann T, Klumpp A, Henke J, Guth B: Evaluation of cardiovascular and ECG parameters in the normal, freely moving Gottingen Minipig. *J Pharmacol Toxicol Methods* 2008; 57:202-11
- Schwartz JB, Heere JM: The electrophysiological effects of alpha-chloralose anesthesia in the intact dog: (1) Alone and (2) in combination with verapamil. *Pacing Clin Electro-physiol* 1989; 12:283-93
- Bardaji A, Cinca J, Worner F, Schoenenberger A: Effects of anaesthesia on acute ischaemic arrhythmias and epicardial electrograms in the pig heart in situ. *Cardiovasc Res* 1990; 24:227-31

(Accepted for publication October 28, 2009.)

## Insertion of the i-gel™ Airway Obstructed by the Tongue

#### To the Editor:

In the July 2009 issue of *ANESTHESIOLOGY*, Theiler *et al.*<sup>1</sup> published an article in which they compared the *Laryngeal Mask Supreme™* (Laryngeal Mask Company, Henley-on-Thames, United Kingdom) with the i-gel™ (Intersurgical Ltd., Wokingham, Berkshire, United Kingdom) airway. The authors commented that the bulky design of the i-gel™ made insertion time longer, and that tongue size may have an influence on insertion. We noticed a similar problem during the insertion of i-gel™ a few times. During insertion, the cuff carried the tongue along with it posteriorly, making further motion of the i-gel™ impossible. All the patients were in “sniffing the morning air” position as advised by the manufacturer.<sup>2</sup> The device was adequately lubricated. Jaw thrust and insertion with deep rotation were tried<sup>2</sup> when difficulty occurred, but these maneuvers did not solve the problem. Hence, we had to remove and then reinsert the i-gel™ after pulling out and stabilizing the tongue.

The i-gel™ has a noninflatable cuff made of styrene ethylene butadiene styrene. This cuff fits snugly onto the perilaryngeal framework.<sup>2</sup> Unfortunately, the texture and design of the cuff entraps the tongue during insertion. The manufacturers recommend insertion of the device without introducing the fingers,<sup>2</sup> but we feel, in difficult circumstances
